# Supplementary material for: MMP-2 sensitive poly(malic acid) micelles stabilized by π–π stacking enable high drug loading capacity
Source: Royal Society of Chemistry journal article supplement (doi:10.1039/d0tb01682a), 2020-01-01
Supplement: d0tb01682a1.pdf [file d0tb01682a1.pdf]

## Supporting information

### MMP-2 Sensitive Poly (malic acid) Micelles Stabilized by $\pi$ - $\pi$ Stacking Enable High Drug

#### Loading Capacity

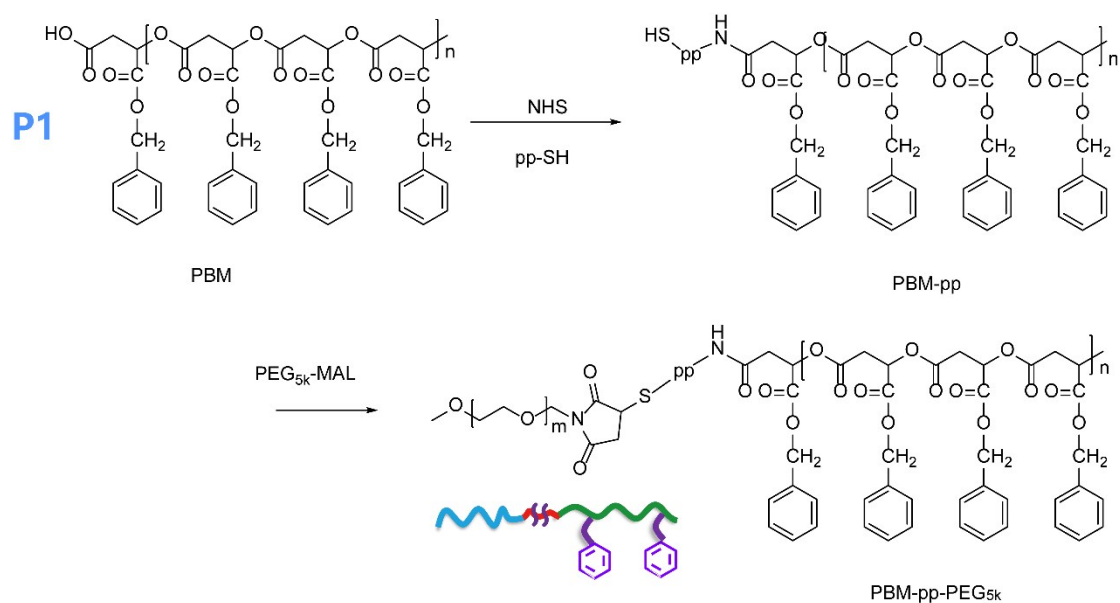

Fig. S1. The synthetic routes for amphipathic polymer PBM-pp-PEG<sub>5k</sub> (P1)

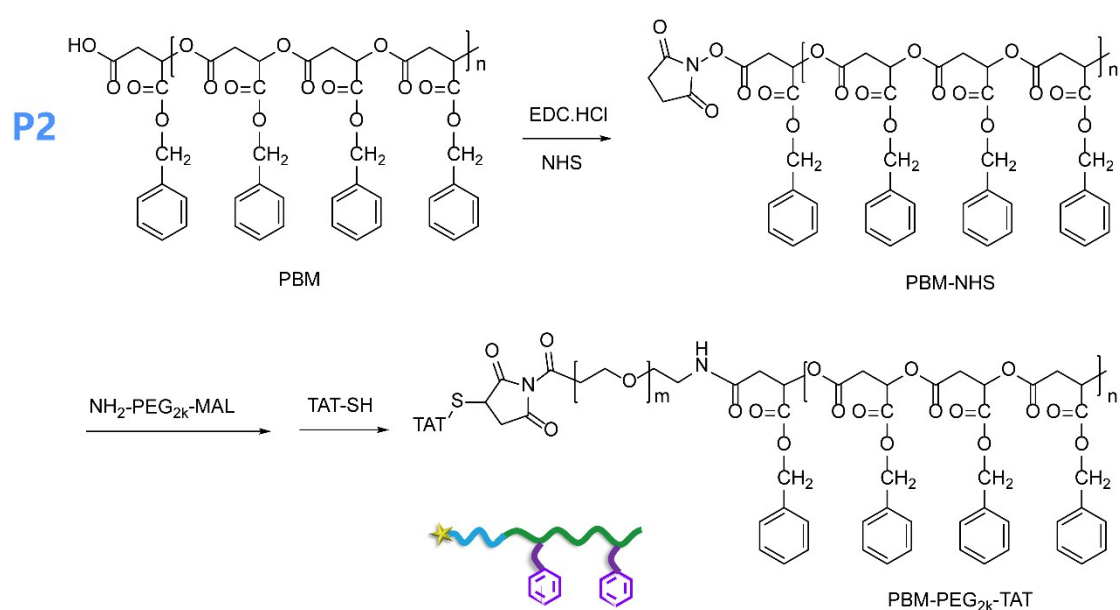

Fig. S2. The synthetic routes for amphipathic polymer PBM-PEG<sub>2k</sub>-TAT (P2)

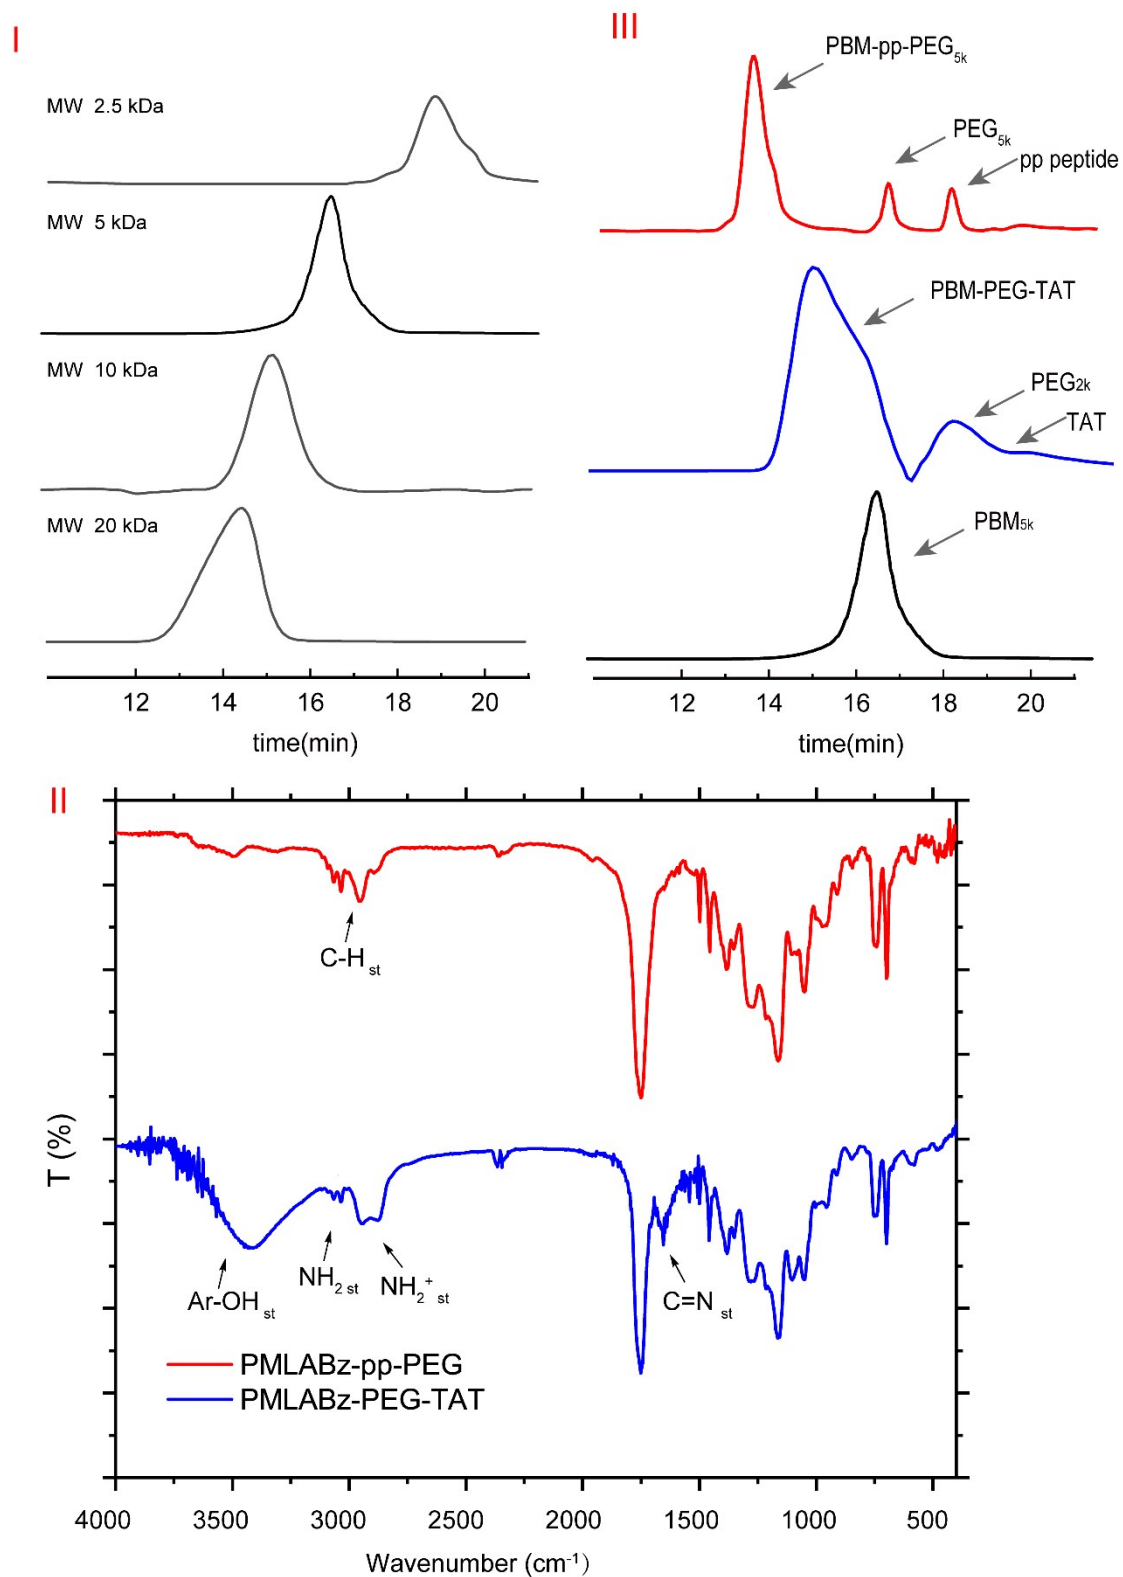

Fig. S3. II. GPC of PBM with different molecular weight; II. FTIR spectrum of two polymers: PBM-pp-PEG<sub>5k</sub> (P1, red) and PBM-PEG<sub>2k</sub>-TAT (P2, blue); III. GPC of before and after TAT and

PEG conjugate

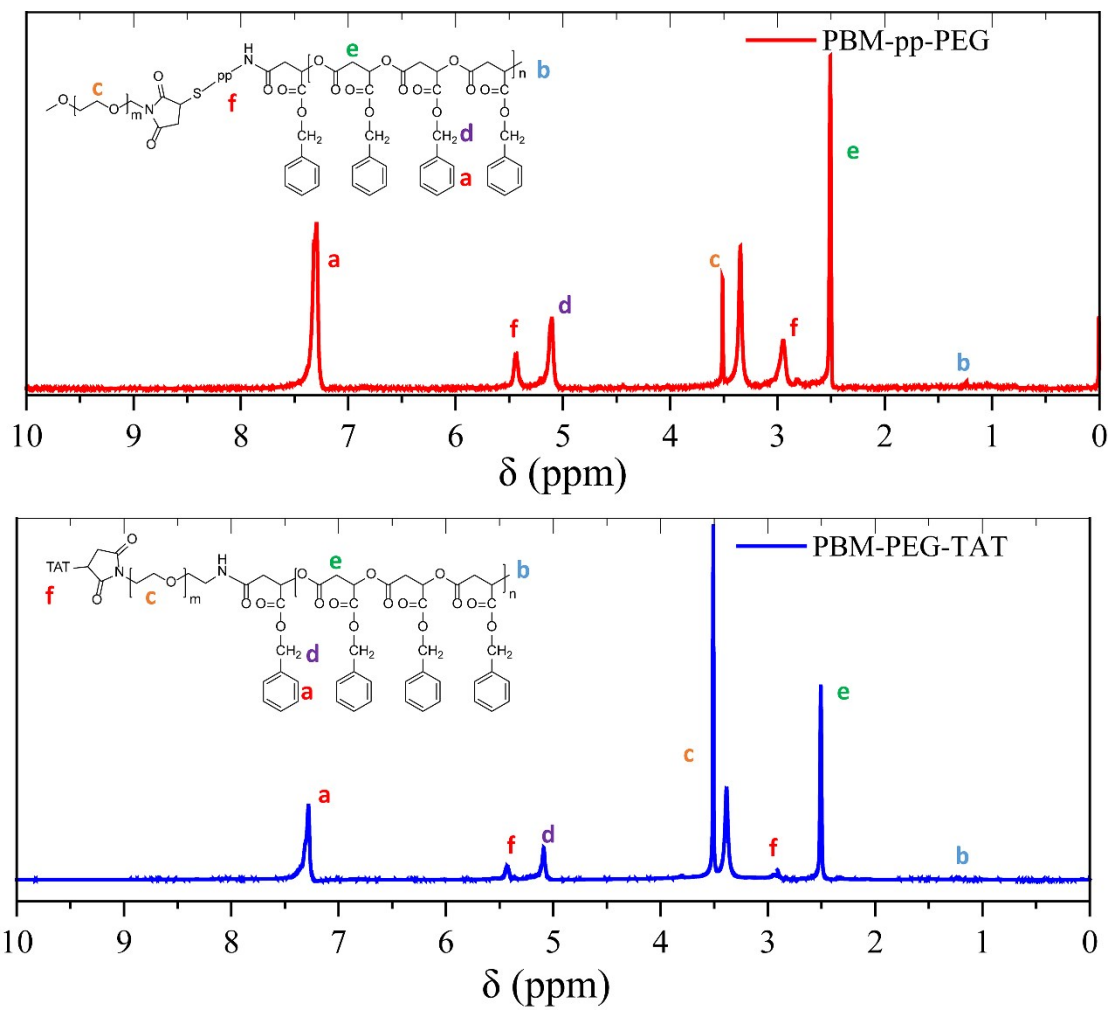

Fig. S4. <sup>1</sup>H-NMR spectrum of two polymers: PBM-pp-PEG<sub>5k</sub> (P1, red) and PBM-PEG<sub>2k</sub>-TAT (P2, blue).

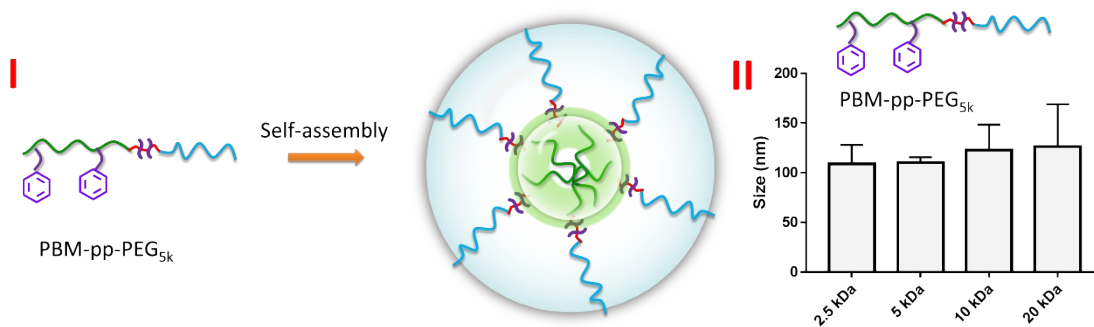

Fig. S5. I: a schematic of micellar preparation; II: size of micelles with different molecular of PBM.

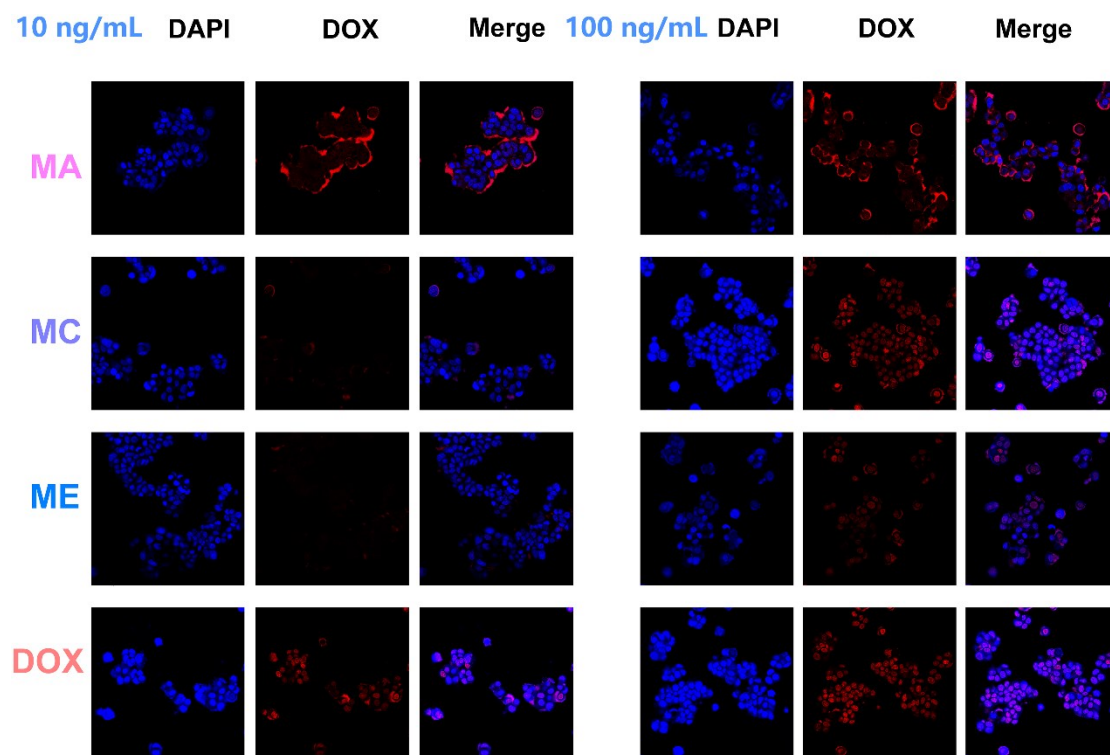

Fig. S6. CLSM images of MCF-7 cells after 4 h incubation with free DOX and DOX-loaded micelles MA, MC and ME at different MMP-2 concentration, 37 °C, 40 X.

Table S1. Size, zeta potential, and CMC of empty micelles. (MA: P2; MB: P1/P2, 5/1; MC: P1/P2, 10/1; MD: P1/P2, 20/1; ME: P1)

| <b>Blank micelle</b> | <b>Molar ratio of P1/P2</b> | <b>Size (nm)</b>  | <b>PDI</b>        | <b>Zeta potential (mV)</b> | <b>CMC (<math>\mu\text{g/mL}</math>)</b> |
|----------------------|-----------------------------|-------------------|-------------------|----------------------------|------------------------------------------|
| MA                   | 0:1                         | 91.8 $\pm$ 32.7   | 0.098 $\pm$ 0.074 | 12.91 $\pm$ 0.80           | 2.6                                      |
| MB                   | 5:1                         | 128.2 $\pm$ 8.1   | 0.210 $\pm$ 0.094 | -5.6 $\pm$ 0.32            | 2.3                                      |
| MC                   | 10:1                        | 133.63 $\pm$ 13.5 | 0.124 $\pm$ 0.091 | -6.45 $\pm$ 0.24           | 3.3                                      |
| MD                   | 20:1                        | 130.93 $\pm$ 6.5  | 0.156 $\pm$ 0.097 | -9.28 $\pm$ 0.46           | 9.4                                      |
| ME                   | 1:0                         | 106.1 $\pm$ 38.2  | 0.21 $\pm$ 0.061  | -4.5 $\pm$ 0.66            | 16.6                                     |

Table S2. Size, zeta potential, drug loading efficiency, and encapsulation efficiency of DOX-loaded micelles. (MA: P2; MB: P1/P2, 5/1; MC: P1/P2, 10/1; MD: P1/P2, 20/1; ME: P1)

| <b>Drug micelle</b> | <b>Molar ratio of P1/P2</b> | <b>Size (nm)</b> | <b>PDI</b>   | <b>Zeta potential</b> | <b>Drug loading efficiency (%)</b> | <b>Encapsulation efficiency (%)</b> |
|---------------------|-----------------------------|------------------|--------------|-----------------------|------------------------------------|-------------------------------------|
| MA                  | 0:1                         | 134.50±34.44     | 0.35±0.669   | 14.26±0.55            | 17.52±1.67                         | 64.03±6.09                          |
| MB                  | 5:1                         | 136.53±22.79     | 0.029±0.102  | 3.26±0.36             | 19.16±2.39                         | 72.01±2.38                          |
| MC                  | 10:1                        | 150.90±25.76     | 0.196±0.373  | 2.35±0.51             | 19.82±1.57                         | 72.22±1.45                          |
| MD                  | 20:1                        | 149.87±14.98     | 0.328±0.126  | -1.25±0.11            | 19.58±1.95                         | 68.98±6.88                          |
| ME                  | 1:0                         | 155.80±34.87     | 0.0402±0.124 | -1.7±0.74             | 20.27±1.95                         | 68.68±9.26                          |

Table S3. The IC<sub>50</sub> values (μg/mL) of micelles and free DOX against HT1080, MCF-7, and MDA-MB-231 cells with different MMP-2 concentration (10 ng/mL and 100 ng/mL) for 48 h, 37 °C.

| Drug<br>micelle | HT 1080  |           | MCF-7    |           | MDA-MB-231 |           |
|-----------------|----------|-----------|----------|-----------|------------|-----------|
|                 | 10 ng/mL | 100 ng/mL | 10 ng/mL | 100 ng/mL | 10 ng/mL   | 100 ng/mL |
| MA              | 0.1128   | 0.06219   | 0.7075   | 0.1964    | 1.421      | 1.394     |
| MC              | 0.1135   | 0.06283   | 2.199    | 0.7171    | 3.67       | 1.908     |
| ME              | 0.1983   | 0.1205    | 3.303    | 1.865     | 3.716      | 4.66      |
| DOX             | 0.09409  | 0.07372   | 0.6452   | 0.4102    | 1.065      | 1.48      |
